# Supplementary material for: Association between psychotic experiences and non-accidental self-injury: results from a nationally representative survey of adolescents
Source: Springer Nature journal article supplement (doi:10.1007/s00127-018-1629-4), 2018-11-26
Supplement: MOESM2 [file 16295096]

Online Resource II

Article title: Association between psychotic experiences and non-accidental self-injury: Results from a nationally representative survey of adolescents

Journal name: Social Psychiatry and Psychiatric Epidemiology

Author names: Emily Hielscher1,2,3, Melissa Connell­1,7, David Lawrence4, Stephen R. Zubrick5,6, Jennifer Hafekost4, James G. Scott1,2,7

Affiliations: 1. Centre for Clinical Research, Faculty of Medicine, The University of Queensland, Brisbane, QLD, Australia; 2. Queensland Centre for Mental Health Research (QCMHR), The Park Centre for Mental Health, Brisbane, QLD, Australia; 3. School of Public Health, Faculty of Medicine, The University of Queensland, Brisbane, QLD, Australia; 4. Graduate School of Education, The University of Western Australia, Perth, WA, Australia; 6. Telethon Kids Institute, The University of Western Australia, West Perth, WA, Australia; University of Western Australia, Centre for Child Health Research; 7. Metro North Mental Health, Royal Brisbane and Women’s Hospital, Herston, QLD, Australia

Email address: [e.hielscher@uq.edu.au](mailto:e.hielscher@uq.edu.au)

First, for each potential confounder and mediator, a point-biserial correlation (continuous variables) or phi coefficients (categorical variables) was calculated to assess whether the variable had a significant relationship with NASI (see Table S2); variables without a significant relationship were excluded from further analysis. Second, point-biserial correlations or phi coefficients were calculated to explore the relationship of each potential confounding and mediating with psychotic experiences. Third, the relationship between each possible confounder and mediator was similarly reviewed. Variables significantly related to multiple other third variables were considered for exclusion. No variables were excluded in the end because each variable represented a distinct construct (no correlation coefficient above .5), they were each associated with psychotic experiences and NASI (both self-harm and suicide attempts), and there was no evidence of multicollinearity in analyses based on standard thresholds for the variance inflation factor. As seen in Table S2, all psychotic experience subtypes were associated with the same confounders and mediators as the ‘any psychotic experience’ composite variable; with one or two exceptions for sociodemographics, disordered eating behaviour, social isolation and parental mental illness.

**Table S2.** Relationships between independent variable (psychotic experiences), dependent variable (NASI) and third variables

| **Variable 1** | **Variable 2** | **Statistic** | **Degrees of freedom** | **Significance** |
| --- | --- | --- | --- | --- |
| 12-month psychotic experiences (any) | Age | *rpb* = -.10 | 1996 | *p* < .001 |
| Sex | ɸ = .07 | 1 | *p* = .002 |
| Major depressive disorder | ɸ = .21 | 1 | *p* < .001 |
|  | Disordered eating behaviours | ɸ = .05 | 1 | *p* = .04 |
|  | Substance use | ɸ = .09 | 1 | *p* < .001 |
|  | Bullied | ɸ = .16 | 1 | *p* < .001 |
|  | Psychological distress | ɸ = .21 | 1 | *p* < .001 |
|  | Self-esteem | ɸ = .16 | 1 | *p* < .001 |
|  | Mental health service use | ɸ = .17 | 1 | *p* < .001 |
|  | Parent mental illness | ɸ = .04 | 1 | *p* = .05 |
|  | Insufficient sleep (hours) | ɸ = .14 | 1 | *p* < .001 |
|  | Social isolation | *rpb* = .09 | 1996 | *p* < .001 |
| 12-month auditory hallucinatory experiences | Age | *rpb* = -.05 | 1996 | *p* = .04 |
| Sex | ɸ = .07 | 1 | *p* = .001 |
| Major depressive disorder | ɸ = .21 | 1 | *p* < .001 |
| Disordered eating behaviours | ɸ = .04 | 1 | *p* = .04 |
| Substance use | ɸ = .09 | 1 | *p* < .001 |
| Bullied | ɸ = .16 | 1 | *p* < .001 |
| Psychological distress | ɸ = .20 | 1 | *p* < .001 |
| Self-esteem | ɸ = .13 | 1 | *p* < .001 |
| Mental health service use | ɸ = .19 | 1 | *p* < .001 |
| Parent mental illness | ɸ = .03 | 1 | n.s. |
| Insufficient sleep (hours) | ɸ = .11 | 1 | *p* < .001 |
| Social isolation | *rpb* = .07 | 1996 | *p* = .003 |
| 12-month visual hallucinatory experiences | Age | *rpb* = -.11 | 1996 | *p* < .001 |
| Sex | ɸ = .04 | 1 | n.s. |
| Major depressive disorder | ɸ = .18 | 1 | *p* < .001 |
|  | Disordered eating behaviour | ɸ = .03 | 1 | n.s. |
|  | Substance use | ɸ = .07 | 1 | *p* = .004 |
|  | Bullied | ɸ = .13 | 1 | *p* < .001 |
|  | Psychological distress | ɸ = .15 | 1 | *p* < .001 |
|  | Self-esteem | ɸ = .10 | 1 | *p* < .001 |
|  | Mental health service use | ɸ = .13 | 1 | *p* < .001 |
|  | Parent mental illness | ɸ = .05 | 1 | *p* = .03 |
|  | Insufficient sleep (hours) | ɸ = .10 | 1 | *p* < .001 |
|  | Social isolation | *rpb* = .03 | 1996 | n.s |
| 12-month thoughts read | Age | *rpb* = -.06 | 1996 | *p* = .01 |
| Sex | ɸ = .06 | 1 | *p* = .01 |
| Major depressive disorder | ɸ = .18 | 1 | *p* < .001 |
|  | Disordered eating behaviour | ɸ = .08 | 1 | *p* = .001 |
|  | Substance use | ɸ = .04 | 1 | n.s. |
|  | Bullied | ɸ = .07 | 1 | *p* = .002 |
|  | Psychological distress | ɸ = .17 | 1 | *p* < .001 |
|  | Self-esteem | ɸ = .15 | 1 | *p* < .001 |
|  | Mental health service use | ɸ = .11 | 1 | *p* < .001 |
|  | Parent mental illness | ɸ = .05 | 1 | *p* = .05 |
|  | Insufficient sleep (hours) | ɸ = .06 | 1 | *p* = .01 |
|  | Social isolation | *rpb* = .05 | 1996 | *p* = .02 |
| 12-month special messages | Age | *rpb* = .01 | 1996 | n.s. |
| Sex | ɸ = -.01 | 1 | n.s. |
| Major depressive disorder | ɸ = .10 | 1 | *p* < .001 |
|  | Disordered eating behaviour | ɸ = .04 | 1 | n.s. |
|  | Substance use | ɸ = .07 | 1 | *p* = .003 |
|  | Bullied | ɸ = .06 | 1 | *p* = .006 |
|  | Psychological distress | ɸ = .08 | 1 | *p* < .001 |
|  | Self-esteem | ɸ = .06 | 1 | *p* = .007 |
|  | Mental health service use | ɸ = .07 | 1 | *p* = .004 |
|  | Parent mental illness | ɸ = -.02 | 1 | n.s. |
|  | Insufficient sleep (hours) | ɸ = .06 | 1 | *p* = .005 |
|  | Social isolation | *rpb* = .02 | 1996 | n.s |
| 12-month spied upon | Age | *rpb* = -.05 | 1996 | *p* = .02 |
| Sex | ɸ = .06 | 1 | *p* = .01 |
|  | Major depressive disorder | ɸ = .18 | 1 | *p* < .001 |
|  | Disordered eating behaviour | ɸ = .06 | 1 | *p* = .01 |
|  | Substance use | ɸ = .09 | 1 | *p* < .001 |
|  | Bullied | ɸ = .15 | 1 | *p* < .001 |
|  | Psychological distress | ɸ = .23 | 1 | *p* < .001 |
|  | Self-esteem | ɸ = .16 | 1 | *p* < .001 |
|  | Mental health service use | ɸ = .16 | 1 | *p* < .001 |
|  | Parent mental illness | ɸ = .01 | 1 | n.s. |
|  | Insufficient sleep (hours) | ɸ = .13 | 1 | *p* <.001 |
|  | Social isolation | *rpb* = .10 | 1996 | *p* < .001 |
| 12-month self-harm | Age | *rpb* = .03 | 1847 | n.s. |
| Sex | ɸ = .19 | 1 | *p* < .001 |
| Major depressive disorder | ɸ = .51 | 1 | *p* < .001 |
| Disordered eating behaviour | ɸ = .20 | 1 | *p* < .001 |
| Substance use | ɸ = .23 | 1 | *p* < .001 |
| Bullied | ɸ = .24 | 1 | *p* < .001 |
| Psychological distress | ɸ = .47 | 1 | *p* < .001 |
| Self-esteem | ɸ = .39 | 1 | *p* < .001 |
| Mental health service use | ɸ = .31 | 1 | *p* < .001 |
| Parent mental illness | ɸ = .09 | 1 | *p* < .001 |
| Insufficient sleep (hours) | ɸ = .22 | 1 | *p* < .001 |
| Social isolation | *rpb* = .16 | 1847 | *p* < .001 |
| 12-month suicide attempt | Age | *rpb* = .04 | 1885 | n.s. |
| Sex | ɸ = .07 | 1 | *p* = .002 |
| Major depressive disorder | ɸ = .37 | 1 | *p* < .001 |
| Disordered eating behaviour | ɸ = .12 | 1 | *p* < .001 |
| Substance use | ɸ = .24 | 1 | *p* < .001 |
| Bullied | ɸ = .14 | 1 | *p* < .001 |
| Psychological distress | ɸ = .32 | 1 | *p* < .001 |
|  | Self-esteem | ɸ = .27 | 1 | *p* < .001 |
|  | Mental health service use | ɸ = .27 | 1 | *p* < .001 |
|  | Parent mental illness | ɸ = .09 | 1 | *p* < .001 |
|  | Insufficient sleep (hours) | ɸ = .13 | 1 | *p* < .001 |
|  | Social isolation | *rpb* = .11 | 1885 | *p* < .001 |
| Age | Sex | *rpb* = .02 | 1996 | n.s. |
| Major depressive disorder | *rpb* = .06 | 1996 | *p* =.006 |
| Disordered eating behaviour | *rpb* = .02 | 1996 | n.s. |
| Substance use | *rpb* = .14 | 1996 | *p* < .001 |
| Bullied | *rpb* = -.09 | 1996 | *p* < .001 |
| Psychological distress | *rpb* = .04 | 1996 | n.s. |
|  | Self-esteem | *rpb* = .01 | 1996 | n.s. |
|  | Mental health service use | *rpb* = .03 | 1996 | n.s. |
|  | Parent mental illness | *rpb* = -.03 | 1996 | n.s. |
|  | Insufficient sleep (hours) | *rpb* = .14 | 1996 | *p* <.001 |
|  | Social isolation | *r* = .06 | 1996 | *p* =.009 |
| Sex | Major depressive disorder | ɸ= .17 | 1 | *p* <.001 |
| Disordered eating behaviour | ɸ= .12 | 1 | *p* <.001 |
| Substance use | ɸ= -.04 | 1 | n.s. |
| Bullied | ɸ= .05 | 1 | *p* =.02 |
| Psychological distress | ɸ= .16 | 1 | *p* <.001 |
|  | Self-esteem | ɸ= .10 | 1 | *p* <.001 |
|  | Mental health service use | ɸ= .19 | 1 | *p* <.001 |
|  | Parent mental illness | ɸ= -.02 | 1 | n.s. |
|  | Insufficient sleep (hours) | ɸ= .11 | 1 | *p* <.001 |
|  | Social isolation | *rpb* = -.003 | 1996 | n.s. |
| Major depressive disorder | Disordered eating behaviour | ɸ= .16 | 1 | *p* <.001 |
| Substance use | ɸ= .17 | 1 | *p* <.001 |
| Bullied | ɸ= .24 | 1 | *p* <.001 |
|  | Psychological distress | ɸ= .49 | 1 | *p* <.001 |
|  | Self-esteem | ɸ= .38 | 1 | *p* <.001 |
|  | Mental health service use | ɸ= .37 | 1 | *p* <.001 |
|  | Parent mental illness | ɸ= .09 | 1 | *p* <.001 |
|  | Insufficient sleep (hours) | ɸ= .22 | 1 | *p* <.001 |
|  | Social isolation | *rpb* = .18 | 1996 | *p* <.001 |
| Disordered eating  behaviours | Substance use | ɸ= .09 | 1 | *p* <.001 |
| Bullied | ɸ= .09 | 1 | *p* <.001 |
|  | Psychological distress | ɸ= .15 | 1 | *p* <.001 |
|  | Self-esteem | ɸ= .16 | 1 | *p* <.001 |
|  | Mental health service use | ɸ= .12 | 1 | *p* <.001 |
|  | Parent mental illness | ɸ= .03 | 1 | n.s. |
|  | Insufficient sleep (hours) | ɸ= .07 | 1 | *p* =.001 |
|  | Social isolation | *rpb* = .09 | 1996 | *p* <.001 |
| Substance use | Bullied | ɸ= .10 | 1 | *p* <.001 |
|  | Psychological distress | ɸ= .17 | 1 | *p* <.001 |
|  | Self-esteem | ɸ= .06 | 1 | *p* =.004 |
|  | Mental health service use | ɸ= .14 | 1 | *p* <.001 |
|  | Parent mental illness | ɸ= .06 | 1 | *p* =.008 |
|  | Insufficient sleep (hours) | ɸ= .11 | 1 | *p* <.001 |
|  | Social isolation | *rpb* = .07 | 1996 | *p* =.001 |
| Bullied | Psychological distress | ɸ= .25 | 1 | *p* <.001 |
|  | Self-esteem | ɸ= .18 | 1 | *p* <.001 |
|  | Mental health service use | ɸ= .17 | 1 | *p* <.001 |
|  | Parent mental illness | ɸ= .09 | 1 | *p* <.001 |
|  | Insufficient sleep (hours) | ɸ= .09 | 1 | *p* <.001 |
|  | Social isolation | *rpb* = .13 | 1996 | *p* <.001 |
| Psychological  distress | Self-esteem | ɸ= .42 | 1 | *p* <.001 |
| Mental health service use | ɸ= .32 | 1 | *p* <.001 |
|  | Parent mental illness | ɸ= .06 | 1 | *p* =.007 |
|  | Insufficient sleep (hours) | ɸ= .24 | 1 | *p* <.001 |
|  | Social isolation | *rpb* = .18 | 1996 | *p* <.001 |
| Self-esteem | Mental health service use | ɸ= .20 | 1 | *p* <.001 |
|  | Parent mental illness | ɸ= .08 | 1 | *p* <.001 |
|  | Insufficient sleep (hours) | ɸ= .15 | 1 | *p* <.001 |
|  | Social isolation | *rpb* = .25 | 1996 | *p* <.001 |
| Mental health service use | Parent mental illness | ɸ= .09 | 1 | *p* <.001 |
| Insufficient sleep (hours) | ɸ= .16 | 1 | *p* <.001 |
|  | Social isolation | *rpb* = .12 | 1996 | *p* <.001 |
| Parental mental illness | Insufficient sleep (hours) | ɸ= .03 | 1 | n.s. |
| Social isolation | *rpb* = .03 | 1996 | n.s. |
| Insufficient sleep (hours) | Social isolation | *rpb* = .13 | 1996 | *p* <.001 |
